# Supplementary material
Source: ML conference proceedings conference paper supplement (https://openreview.net/forum?id=2-b3rTYDt)
Supplement: supplementary_material [file attachment]

---

# Generative Evolutionary Strategy For Black-Box Optimizations

## *supplementary Document*

---

Anonymous Author(s)

Affiliation

Address

email

## 1 A Implementation Details

### 2 A.1 Neural networks

3 In order to make a general optimizer, the variable size should be changeable in the last layer of  
4 generator networks. In this case, a self-attention network (transformer) can be a simple choice. CNN  
5 is advantageous in making large-size output tensors using few parameters. However, CNN has too  
6 strong spatial correlations, and also, its output size is not flexible. Fully connected (FC) networks  
7 could be easier than CNN to control output tensor size, but they have too many parameters in general.

8 A multi-head attention structure with 8 heads and  $d_{model} = 64$  was used. Position-Wise Feed  
9 Forward network (FFNN) has a hidden layer of  $d_{ff} = 4 \times d_{model}$  and consists of two FC layers. For  
10 activations, we used a *hswish* function. Dropout is set to zero in the generator to avoid randomness.  
11 Non-zero dropout generators are also tested with random feed  $z$  and age-evolution to measure the  
12 performances of stochastic generators. The self-attention network of this study is a modification of  
13 an original transformer. It is divided into a two-level structure, trunk and branches. The trunk-branch  
14 structure is ad hoc to reduce the memory usage of the network. The variable length is defined as  
15  $n_{variables} = n_{subvar} \times n_{branches}$ . For example,  $dimension = 8192$  can be defined as  $n_{branches} = 4$   
16 and  $n_{subvar} = 2048$ .

### 17 A.2 Optimization

18 A critic network corresponds to a single-objective target. For example, two critic networks are  
19 prepared for  $(f_1, f_2)$  of ZDT1, 2, and 3. We used  $L1$  loss for critic network training to reduce the  
20 excessive influence of outlier data. In the experiment, 50 mutations per objective were carried out  
21 for every iteration. Random mutations also can be added. The random mutation randomly selects a  
22 layer and adds random normal noise to parameters. However, we find no significant performance  
23 difference between random and without random mutation. The pool size was fixed to 1,000, and the  
24 buffer size was fixed to 10,000. Mini-batch calculation can be hard to implement due to a lack of  
25 GPU memory. Instead, we carried out stochastic gradient descent (SGD).

26 For neural network calculations, Pytorch 1.7.1 with Python 3.7 was used. For evolution strategies,  
27 Pymoo 0.4.2 was used. For a Bayesian optimization (GP), we used an optimization package (non-  
28 public) of SAMSUNG-DS.

### 29 A.3 Test functions

30 Scores of test functions were normalized to variable dimensions. For the global minimum of the  
31 Styblinski-Tang function, we adjusted its global minimum to 0.0 by adding 39.16617. The formula  
32 of Ackley, Rastrigin Rosenbrock, Styblinski-Tang, and ZDT functions are defined in Table 1

33 Cartpole-V1 has (*left, right*) actions for every time step. We set  $N$  dimensional real space  
34  $(x_1, x_2, \dots, x_N)$ , and convert it to *left* and *right* actions by assuming *left* :  $x_t < 0$  and  
35 *right* :  $0 < x_t$ . As a result, the black-box becomes a flat and discontinuous function.

36 LeNet-5 is a small size CNN model for image classification. We trained LeNet-5 with MNIST dataset  
37 (Creative Commons Attribution-Share Alike 3.0 license). We assumed predictions of LeNet-5 as  
38 scores. Therefore, a softmax function should be added in the final layer to make a score range  $[0, 1]$ .

#### 39 **A.4 Pareto efficiency**

40 We introduce a simple description of Pareto efficiency in the main paper. Pareto efficiency is the  
41 result of a non-dominated sorting, and it evaluates points and their corresponding multi-objective  
42 scores by giving ranks. (Figure 2) The importance of non-dominated sorting in the optimization of  
43 multi-objective functions has also been studied.

44 For a sorting of single-objective data, there are various methods such as bubble sort, heap sort, quick  
45 sort, and Tim sort. The difference between the sorting algorithms are space complexity and time  
46 complexity, especially time complexity is considered to be important. It is known that each has  
47 advantages and disadvantages, but the quick sort method is widely used since it has  $\mathcal{O}(N \log N)$   
48 complexity in general. Similarly, there are various non-dominated sorting methods of Pareto efficiency,  
49 and each has advantages and disadvantages. In the worst case, the time complexity increases to  
50  $\mathcal{O}(N^3)$ . Until recently, various non-dominated sorting techniques based on divide-and-conquer have  
51 been developed, which have a time complexity of  $\mathcal{O}(N \log N)$ . However, in this experiment, the  
52 pool size is fixed, and the size is small. Also, the time consumption of the sorting algorithm is much  
53 smaller than the training time of neural networks. Therefore, in this experiment (pool size=1,000, and  
54 function calls = 100,000 case), the choice of sorting algorithm has little effect on the speed of GEO.  
55 However, it is recommended to use a sorting algorithm with  $\mathcal{O}(N \log N)$  complexity where a very  
56 large pool size is desired.

57 Depending on the pool size and the number of mutations, the rank selection strategy of Pareto  
58 efficiency may vary. If the number of mutations is much larger than the pool size, the size of the  
59 rank-1 Pareto efficiency can be larger than the pool size.

## 60 **B Experimental results**

### 61 **B.1 Single-objective test functions**

62 Table 2-6 shows test function optimization results in low and high dimensions. GEO outperforms  
63 other optimizers in high dimensions. However, it tends to be easily trapped at the local optimum  
64 in low dimensions. GEO shows worse performance around 8 64 dimensions, and the performance  
65 degradation range strongly depends on the test function. In dimension 1,024, GEO always shows the  
66 best performance.

### 67 **B.2 Boundary conditions**

68 For ZDT test functions, the boundary of the search domain must be set to  $[0, 1]$ . Since the neural  
69 network has an open boundary, an additional bounded function is required as an activation in the last  
70 layer of generators. We can start with a simple bounded function,  $\tanh$ . In this case,  $x = G(z)$  is  
71 defined as

$$x = (bound_{max} - bound_{min}) \frac{\tanh(G(z))}{2} + bound_{min}$$

72 However, one problem of  $\tanh$  boundary condition is a strong edge bias. With  $\tanh$  function, all  
73 variables outside of boundary ( $x < bound_{min}, x > bound_{max}$ ) are mapped to edge of boundary  
74 ( $x = bound_{min}, x = bound_{max}$ ). To avoid the bias problem, we adopted  $\sin$  function. Since  
75 the  $\sin$  function is periodic, we can avoid edge bias. Figure 3 shows performances according to  
76 boundary conditions. In ZDT3,  $\sin$  boundary shows better performance than  $\tanh$  boundary. In  
77 [Styblinski-Tang, Ackley], open boundary shows better performance than others.

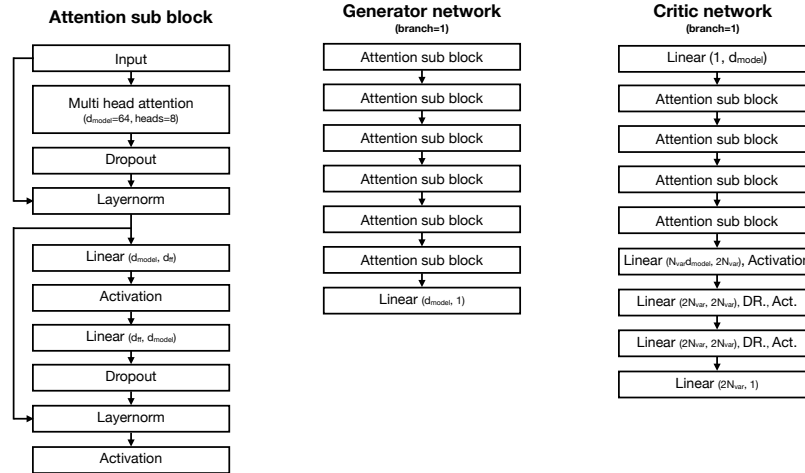

Figure 1: Neural network structures in a single-branch GEO.

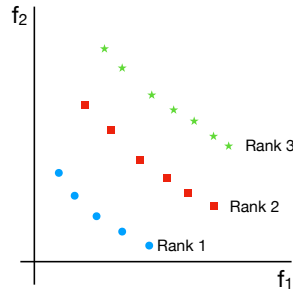

Figure 2: A schematic figure of the Pareto efficiency and ranks.

78 **B.3 Branches**

79 Figure 4 shows Pareto fronts of test functions according to the number of branches. The dimension  
 80 of variables is fixed to 8,192. As the number of branches increases, optimization performances  
 81 decrease for both stochastic and non-stochastic functions. The ad hoc trunk-branch structure is  
 82 memory-efficient, but it can be detrimental to the optimization performance.

83 **B.4 Pool size**

84 Figure 5 shows the Pareto fronts according to evolution pool sizes. In the experiments, four different  
 85 sizes of pools find similar Pareto fronts. Nevertheless, large pools tend to find a broader range of  
 86 Pareto fronts.

Table 1: Test function definitions

| Name            | Formula                                                                                                                                      |
|-----------------|----------------------------------------------------------------------------------------------------------------------------------------------|
| Ackley          | $-20 \exp \left[ -0.2 \sqrt{\frac{1}{N} \sum_{i=1}^N x_i^2} \right] - \exp \left[ \frac{1}{N} \sum_{i=1}^N (\cos 2\pi x_i) \right] + e + 20$ |
| Rastrigin       | $A + \frac{1}{N} \sum_{i=1}^N [x_i^2 - A \cos(2\pi x_i)]$ , where: $A = 10$                                                                  |
| Rosenbrock      | $\frac{1}{N-1} \sum_{i=1}^{N-1} [100(x_{i+1} - x_i^2)^2 + (1 - x_i)^2]$                                                                      |
| Styblinski-Tang | $\frac{1}{2N} \sum_{i=1}^N [x_i^4 - 16x_i^2 + 5x_i]$                                                                                         |
| ZDT functions   | $f_1(x) = x_1$<br>$f_2(x) = g(x)h(f_1(x), g(x))$<br>$g(x) = 1 + \frac{9}{N-1} \sum_{i=2}^N x_i$<br>$0 \leq x_i \leq 1$                       |
| ZDT1            | $h(f_1, g) = 1 - \sqrt{f_1/g}$                                                                                                               |
| ZDT2            | $h(f_1, g) = 1 - (f_1/g)^2$                                                                                                                  |
| ZDT3            | $h(f_1, g) = 1 - \sqrt{f_1/g} - (f_1/g) \sin(10\pi f_1)$                                                                                     |

Table 2: Optimization results of Ackley function in low dimensions. 20,000 function calls. 10 repeats.

| Dimension          | Ackley          |                 |                 |                 |
|--------------------|-----------------|-----------------|-----------------|-----------------|
|                    | 2               | 4               | 8               | 16              |
| GEO                | 0.0000 ± 0.0000 | 0.0071 ± 0.0076 | 0.1009 ± 0.0432 | 0.3014 ± 0.2451 |
| GEO 1-layer        | 0.0000 ± 0.0000 | 0.0030 ± 0.0023 | 0.8575 ± 0.7513 | 1.9020 ± 0.2054 |
| NSGA-II            | 0.0001 ± 0.0002 | 0.0016 ± 0.0008 | 0.0073 ± 0.0033 | 0.0411 ± 0.0066 |
| CMAES              | 0.0000 ± 0.0000 | 0.0000 ± 0.0000 | 0.0000 ± 0.0000 | 0.0000 ± 0.0000 |
| LSM $\epsilon$ 1.0 | 0.0053 ± 0.0081 | 0.0261 ± 0.0118 | 0.1056 ± 0.0292 | 0.2036 ± 0.1139 |
| LSM $\epsilon$ 0.2 | 0.0006 ± 0.0003 | 0.6754 ± 1.3312 | 0.0354 ± 0.0076 | 0.8967 ± 0.9222 |
|                    | 32              | 64              | 128             |                 |
| GEO                | 0.0694 ± 0.0576 | 0.0361 ± 0.0185 | 0.0296 ± 0.0136 |                 |
| GEO 1-layer        | 2.7931 ± 0.1655 | 3.4449 ± 0.1133 | 3.8488 ± 0.1002 |                 |
| NSGA-II            | 0.1132 ± 0.0163 | 0.2795 ± 0.0304 | 0.5510 ± 0.0369 |                 |
| CMAES              | 0.0000 ± 0.0000 | 0.0000 ± 0.0000 | 0.0001 ± 0.0000 |                 |
| LSM $\epsilon$ 1.0 | 0.2430 ± 0.1160 | 0.3432 ± 0.1225 | 0.8251 ± 0.2573 |                 |
| LSM $\epsilon$ 0.2 | 2.5080 ± 1.2227 | 3.4657 ± 0.3694 | 3.3817 ± 0.3004 |                 |

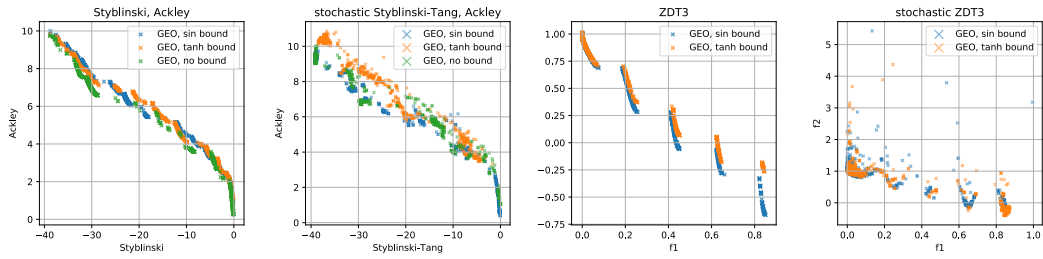

Figure 3: Pareto fronts according to tanh and sin boundary conditions. 100,000 function calls.

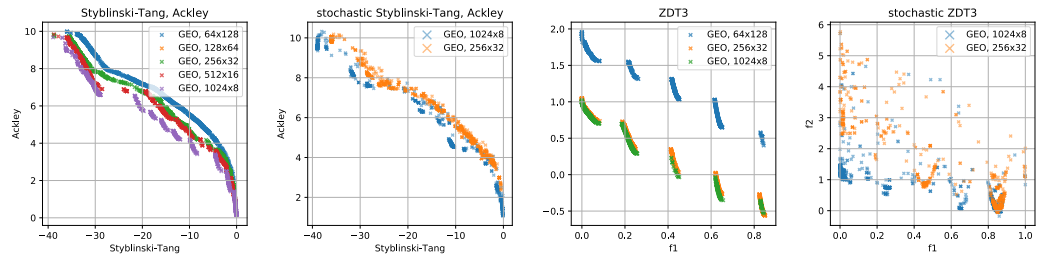

Figure 4: Pareto fronts according to the number of branches ( $8,192 = n_{subvar} \times n_{branches}$ ). 100,000 function calls.

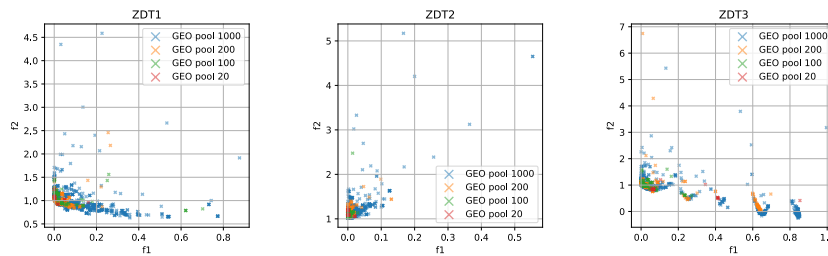

Figure 5: Pareto fronts according to the pool size. 100,000 function calls.

Table 3: Optimization results of Rosenbrock function in low dimensions. 20,000 function calls. 10 repeats.

| Dimension          | Rosenbrock       |                   |                   |                 |
|--------------------|------------------|-------------------|-------------------|-----------------|
|                    | 2                | 4                 | 8                 | 16              |
| GEO                | 0.0000 ± 0.0000  | 0.0543 ± 0.1507   | 0.5090 ± 0.4545   | 0.5378 ± 0.5966 |
| GEO 1-layer        | 0.0000 ± 0.0000  | 0.3062 ± 0.2330   | 0.8592 ± 0.2276   | 3.2036 ± 1.7442 |
| NSGA-II            | 0.0001 ± 0.0001  | 0.0888 ± 0.0488   | 0.5197 ± 0.1102   | 0.8267 ± 0.0755 |
| CMAES              | 0.0000 ± 0.0000  | 0.0000 ± 0.0000   | 0.0000 ± 0.0000   | 0.0000 ± 0.0000 |
| LSM $\epsilon$ 1.0 | 0.3805 ± 0.3780  | 0.8514 ± 0.3439   | 1.3913 ± 0.1683   | 1.7246 ± 0.1924 |
| LSM $\epsilon$ 0.2 | 0.5814 ± 0.3466  | 0.5992 ± 0.3083   | 0.6444 ± 0.3757   | 0.7882 ± 0.2399 |
|                    | 32               | 64                | 128               |                 |
| GEO                | 0.1705 ± 0.2817  | 0.0564 ± 0.0975   | 0.0164 ± 0.0170   |                 |
| GEO 1-layer        | 11.3029 ± 1.3108 | 32.3401 ± 3.7944  | 61.4009 ± 4.9140  |                 |
| NSGA-II            | 1.7519 ± 0.5589  | 4.0404 ± 0.4313   | 5.9195 ± 0.2543   |                 |
| CMAES              | 0.6532 ± 0.0278  | 0.9068 ± 0.0150   | 0.9734 ± 0.0102   |                 |
| LSM $\epsilon$ 1.0 | 1.8820 ± 0.5490  | 2.1025 ± 0.7888   | 2.0884 ± 0.7405   |                 |
| LSM $\epsilon$ 0.2 | 1.5623 ± 0.7663  | 17.4755 ± 25.1455 | 38.9798 ± 23.4691 |                 |

Table 4: Optimization results of Rastrigin function in low dimensions. 20,000 function calls. 10 repeats.

| Dimension          | Rastrigin       |                 |                 |                 |
|--------------------|-----------------|-----------------|-----------------|-----------------|
|                    | 2               | 4               | 8               | 16              |
| GEO                | 0.0000 ± 0.0000 | 0.1027 ± 0.1635 | 0.1434 ± 0.2483 | 0.8459 ± 0.6891 |
| GEO 1-layer        | 0.0000 ± 0.0000 | 0.3483 ± 0.1219 | 0.4758 ± 0.2170 | 1.2868 ± 0.3246 |
| NSGA-II            | 0.0000 ± 0.0000 | 0.0000 ± 0.0000 | 0.0010 ± 0.0009 | 0.0127 ± 0.0048 |
| CMAES              | 0.2985 ± 0.3300 | 0.4477 ± 0.2168 | 0.5721 ± 0.2021 | 0.4166 ± 0.1446 |
| LSM $\epsilon$ 1.0 | 0.5375 ± 0.4406 | 3.6183 ± 1.9796 | 5.6259 ± 1.2943 | 5.5754 ± 1.3568 |
| LSM $\epsilon$ 0.2 | 0.0000 ± 0.0000 | 0.5076 ± 0.4908 | 0.3248 ± 0.3222 | 0.4995 ± 0.2248 |
|                    | 32              | 64              | 128             |                 |
| GEO                | 1.8010 ± 1.2062 | 1.9690 ± 1.3727 | 0.8947 ± 1.1321 |                 |
| GEO 1-layer        | 2.8961 ± 0.3151 | 4.9785 ± 0.2506 | 6.4839 ± 0.2165 |                 |
| NSGA-II            | 0.1580 ± 0.0452 | 0.5013 ± 0.0478 | 0.9218 ± 0.0550 |                 |
| CMAES              | 0.5006 ± 0.1526 | 0.5208 ± 0.0961 | 0.6630 ± 0.0978 |                 |
| LSM $\epsilon$ 1.0 | 5.1430 ± 1.5115 | 7.8261 ± 0.8673 | 8.8664 ± 0.6537 |                 |
| LSM $\epsilon$ 0.2 | 0.6955 ± 0.3504 | 4.9844 ± 2.2791 | 7.5184 ± 1.6464 |                 |

Table 5: Optimization results of Styblinski function in low dimensions. 20,000 function calls. 10 repeats.

| Dimension          | Styblinski-Tang  |                  |                  |                  |
|--------------------|------------------|------------------|------------------|------------------|
|                    | 2                | 4                | 8                | 16               |
| GEO                | 0.0000 ± 0.0000  | 0.0009 ± 0.0014  | 0.0023 ± 0.0017  | 0.0161 ± 0.0176  |
| GEO 1-layer        | 2.1695 ± 3.2087  | 8.5127 ± 2.2338  | 15.9916 ± 1.1828 | 22.4661 ± 0.5406 |
| NSGA-II            | 0.7068 ± 2.1205  | 0.7069 ± 1.4137  | 3.5346 ± 2.3707  | 5.2253 ± 0.9198  |
| CMAES              | 7.0684 ± 5.4751  | 12.7231 ± 3.2391 | 10.9560 ± 2.5971 | 9.7190 ± 2.3708  |
| LSM $\epsilon$ 1.0 | 26.2230 ± 1.9996 | 7.6978 ± 1.2559  | 6.4853 ± 3.9141  | 9.5768 ± 4.0347  |
| LSM $\epsilon$ 0.2 | 27.6515 ± 2.8802 | 16.1667 ± 1.6806 | 12.1698 ± 2.0510 | 19.3622 ± 3.1020 |
|                    | 32               | 64               | 128              |                  |
| GEO                | 0.0064 ± 0.0092  | 1.4138 ± 4.2410  | 0.0000 ± 0.0000  |                  |
| GEO 1-layer        | 25.3427 ± 0.5938 | 27.5193 ± 0.6898 | 29.3574 ± 0.3288 |                  |
| NSGA-II            | 7.9346 ± 1.0712  | 11.2910 ± 0.5126 | 18.3960 ± 0.3724 |                  |
| CMAES              | 8.4820 ± 2.2159  | 9.9841 ± 0.6612  | 9.2883 ± 0.5663  |                  |
| LSM $\epsilon$ 1.0 | 9.7605 ± 4.3111  | 8.7600 ± 2.9911  | 17.5349 ± 4.3426 |                  |
| LSM $\epsilon$ 0.2 | 18.9152 ± 2.6356 | 32.2802 ± 2.4185 | 33.5116 ± 2.6515 |                  |

Table 6: Optimization results of test functions in high dimensions. 50,000 function calls. 10 repeats

| Dimension | Ackley           |                  |                  |
|-----------|------------------|------------------|------------------|
|           | 256              | 512              | 1024             |
| GEO       | 0.0091 ± 0.0036  | 0.0117 ± 0.0037  | 0.0084 ± 0.0029  |
| NSGA-II   | 0.3294 ± 0.0219  | 0.7342 ± 0.0273  | 1.4256 ± 0.0477  |
| CMAES     | 0.0000 ± 0.0000  | 0.0003 ± 0.0000  | 0.0291 ± 0.0035  |
| Dimension | Rosenbrock       |                  |                  |
|           | 256              | 512              | 1024             |
| GEO       | 0.0006 ± 0.0006  | 0.0004 ± 0.0003  | 0.0005 ± 0.0004  |
| NSGA-II   | 5.0726 ± 0.2486  | 5.9915 ± 0.2358  | 6.9435 ± 0.1485  |
| CMAES     | 0.9742 ± 0.0062  | 1.0011 ± 0.0337  | 1.0292 ± 0.0301  |
| Dimension | Rastrigin        |                  |                  |
|           | 256              | 512              | 1024             |
| GEO       | 0.2034 ± 0.4046  | 0.0018 ± 0.0020  | 0.0034 ± 0.0057  |
| NSGA-II   | 0.5636 ± 0.0317  | 0.9810 ± 0.3457  | 1.7443 ± 0.0638  |
| CMAES     | 0.9573 ± 0.1040  | 1.3981 ± 0.1383  | 3.7305 ± 0.6978  |
| Dimension | Styblinski-Tang  |                  |                  |
|           | 256              | 512              | 1024             |
| GEO       | 0.0000 ± 0.0000  | 0.0000 ± 0.0000  | 0.0000 ± 0.0000  |
| NSGA-II   | 14.4536 ± 0.3616 | 22.3592 ± 0.2035 | 28.8298 ± 0.1541 |
| CMAES     | 9.6913 ± 0.4508  | 9.3711 ± 0.1878  | 9.2048 ± 0.2450  |
